# Supplementary material for: Different Mechanisms Underlie the Metabolic Response of GBM Stem-Like Cells to Ionizing Radiation: Biological and MRS Studies on Effects of Photons and Carbon Ions
Source: MDPI journal article supplement (doi:10.3390/ijms21145167), 2020-07-21
Supplement: s1 [file s1]

Line #1

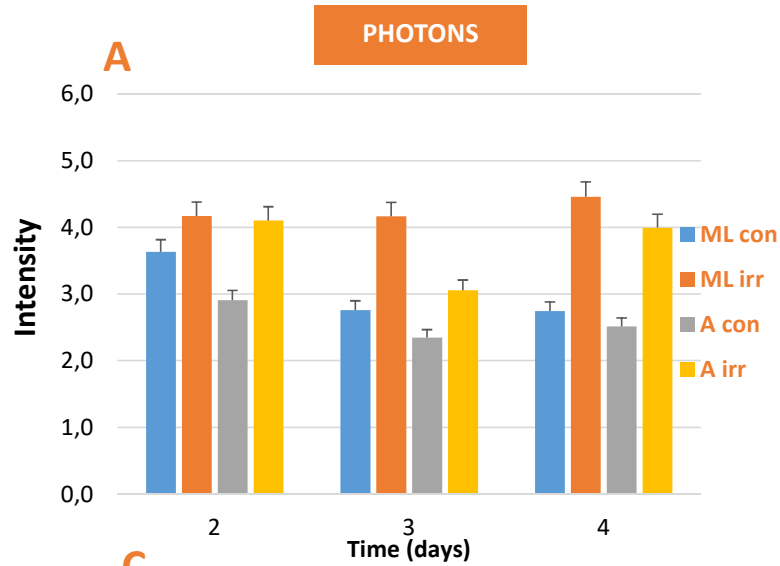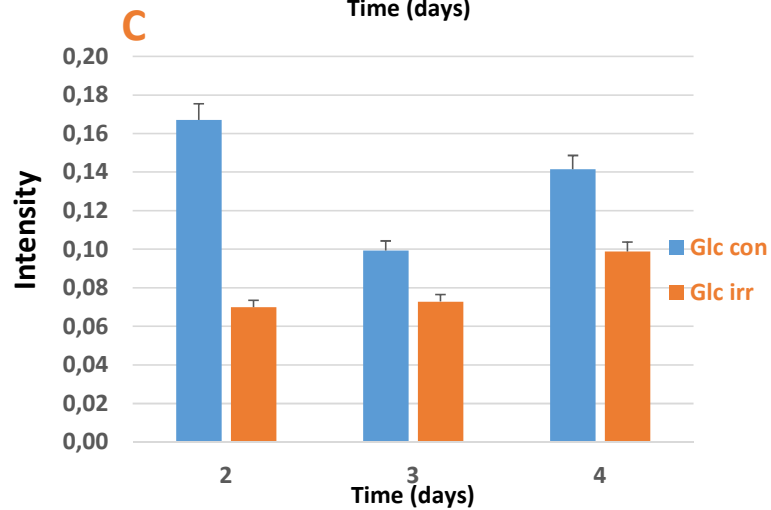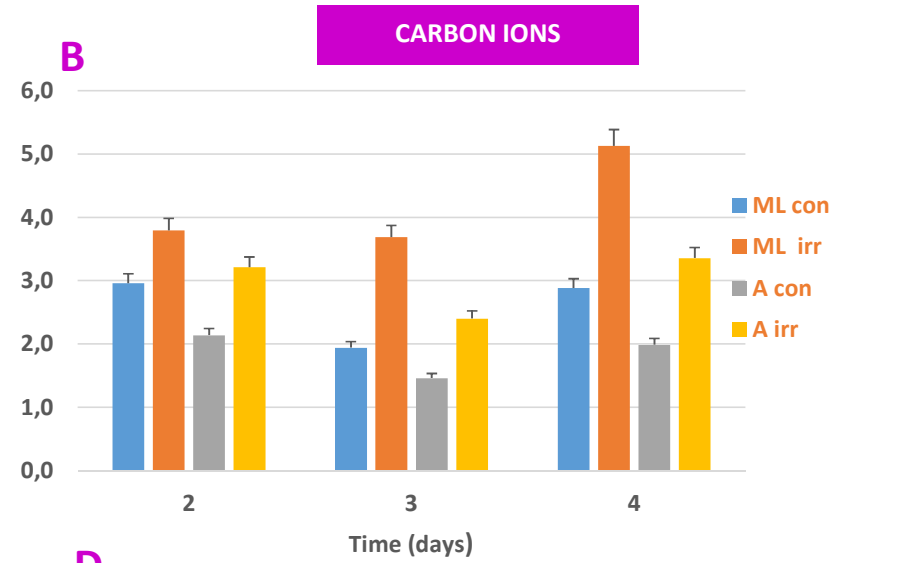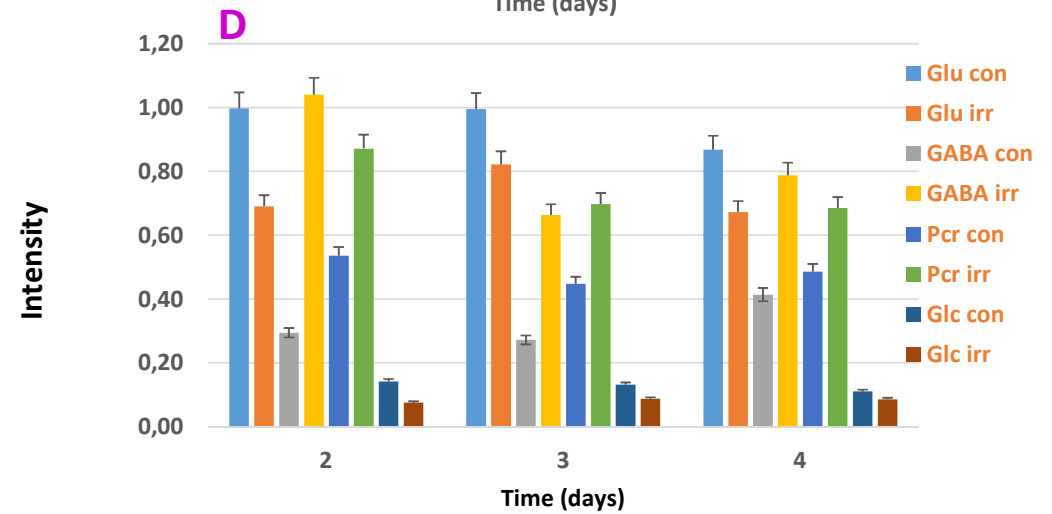

### Metabolic changes observed by mr spectroscopy in line #1 cell spectra.

Intensity of metabolic signals from 1D and 2D spectra as a function of time after photon (A, C) and carbon ion (B, D) irradiation. Both irradiated and control values are reported. A, B: mobile lipid signals (ML, from 1D spectra and A peak from 2D spectra); C: Glucose signal; D: Glutammic acid, GABA, Phosphocreatine and Glucose signals.
