# Supplementary material for: Different Mechanisms Underlie the Metabolic Response of GBM Stem-Like Cells to Ionizing Radiation: Biological and MRS Studies on Effects of Photons and Carbon Ions
Source: MDPI journal article supplement (doi:10.3390/ijms21145167), 2020-07-21
Supplement: s1 [file s1]

## Apoptosis induced by photons

Line #1

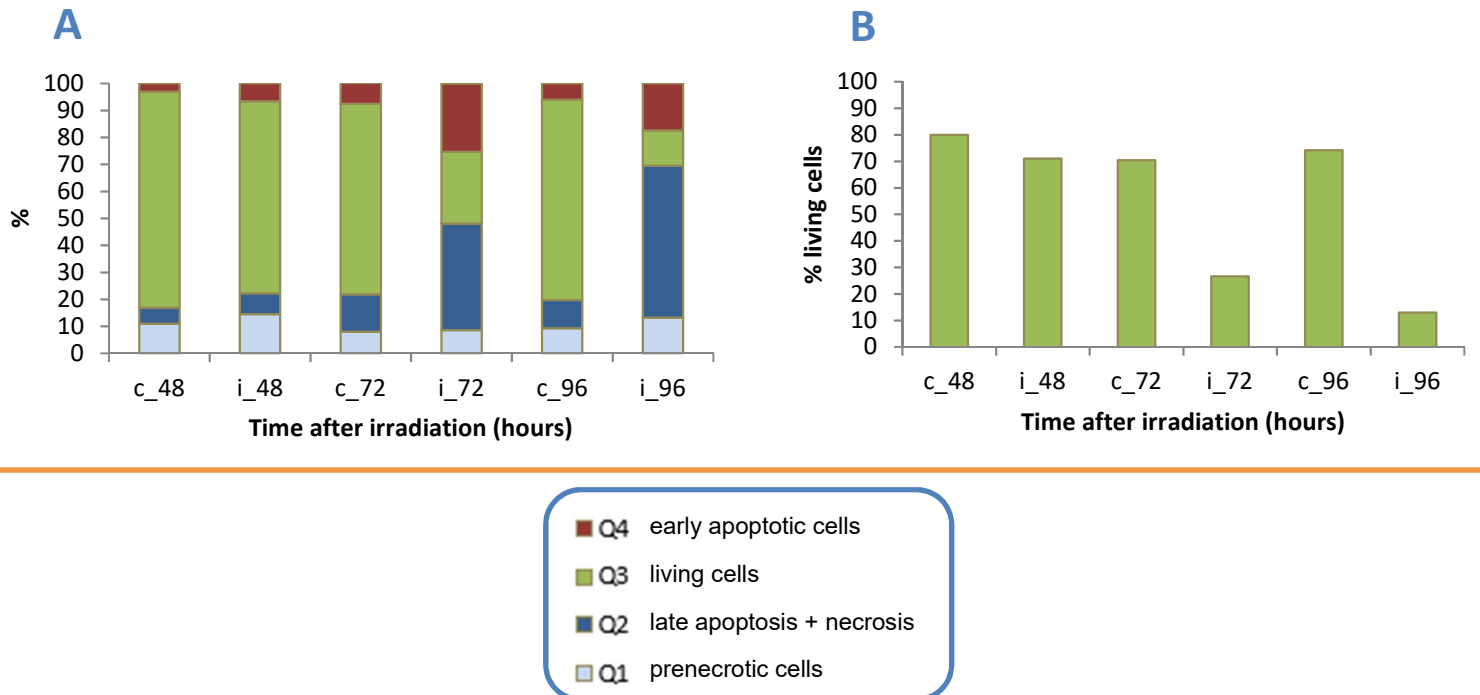

Line #83

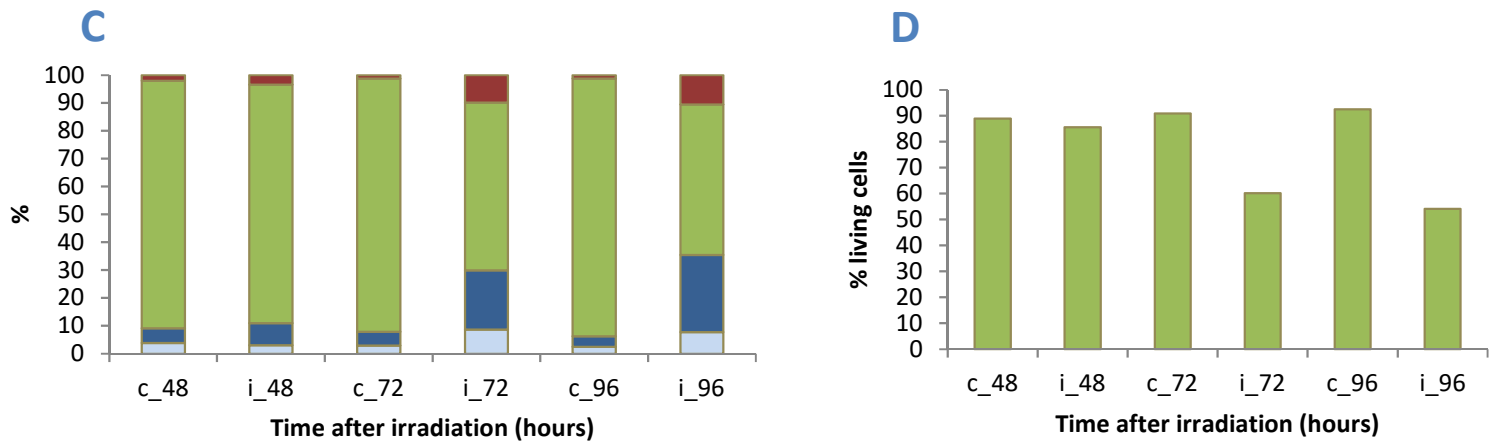

**Figure S1.**

Percentage of line #1 (A) and line #83 (C) photon beam irradiated cells in different phases as obtained by the Annexin V apoptosis assay (Q1 : prenecrotic cells, Q2: late apoptotic + necrotic cells; Q3: living cells; Q4: early apoptotic cells). Data from both irradiated and control samples are compared as a function of time after irradiation.

Percentage of living #1 (B) and #83 (D) cells, calculated as  $Q3/(Q1+Q2+Q3+Q4)*100$ . Data from both irradiated and control samples are compared as a function of time after irradiation.
