# Supplementary material for: Different Mechanisms Underlie the Metabolic Response of GBM Stem-Like Cells to Ionizing Radiation: Biological and MRS Studies on Effects of Photons and Carbon Ions
Source: MDPI journal article supplement (doi:10.3390/ijms21145167), 2020-07-21

## Metabolic characteristics of cell line #1 and #83 and their clones

**Panel A:** Box and whisker plots describing the distribution of intensity values of metabolic signals calculated in spectra from line #1 (red boxes) and line #83 cells (green boxes). Reported values are from mobile lipids (ML, A, B- see main text for description), total Creatine (tCr), and Glutathione (GSH).

Bar graphs in **panels B and C** show fold changes between line #1 and line #83 (calculated as  $\log_2(\text{FC})$ ). The above mentioned metabolites were evaluated together with glutamine (Gln) and glutamate (Glu).

All variations are statistically significant. For Mobile lipids signals a more detailed analysis (panel C) was performed on cross peaks from 2D spectra (A, B, E, F) given their higher statistical significance ( $p < 0.01$ ).

**Panel D:** Box and whiskers plots describing the distribution of intensity values of metabolic signals calculated in spectra from line #83 (green boxes) and its clones (yellow boxes). Reported values are from mobile lipids (ML, A).

Bar graph in **panel E** shows fold changes between line #83 and its clones. Mobile lipid cross peaks from 2D spectra (A, B, E, F) were evaluated. All variations are statistically significant ( $p < 0.05$ ).

Clone analysis for line #1 vs line #1 is not shown because no (statistically) significant differences were found.

**A**

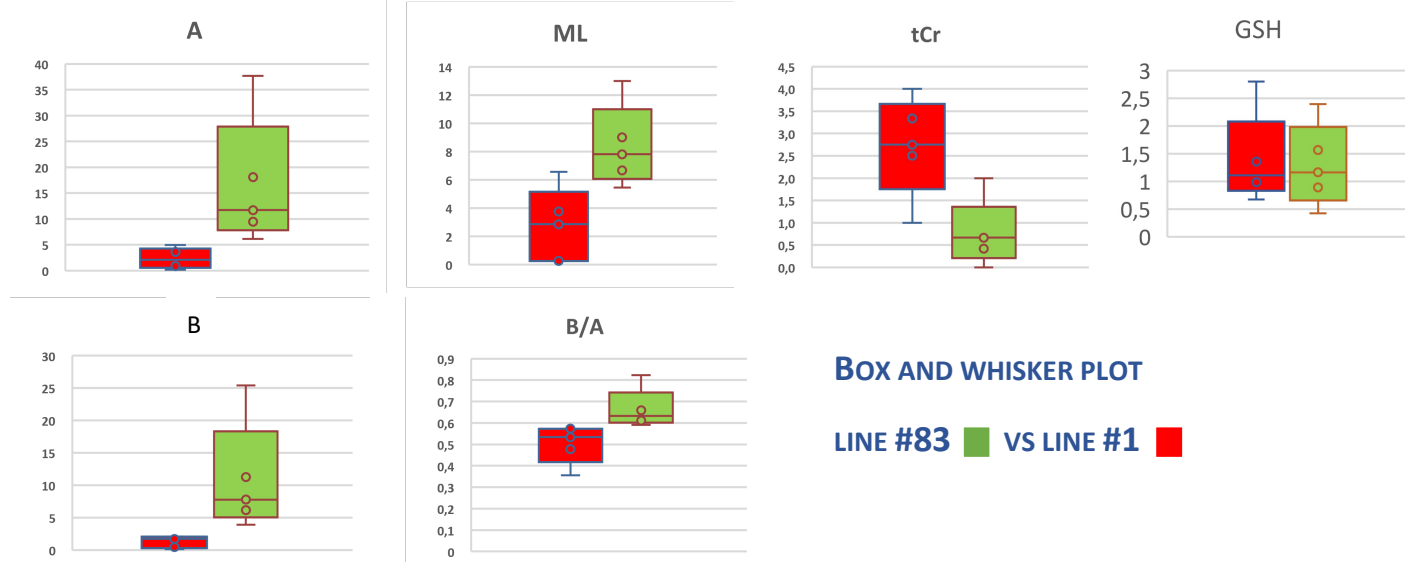

**B**

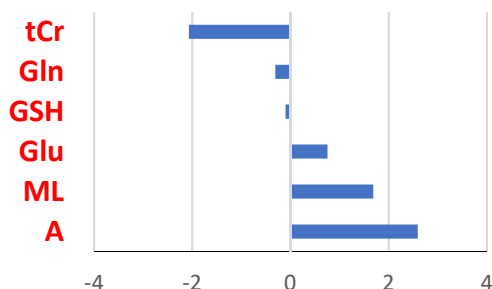

**C**

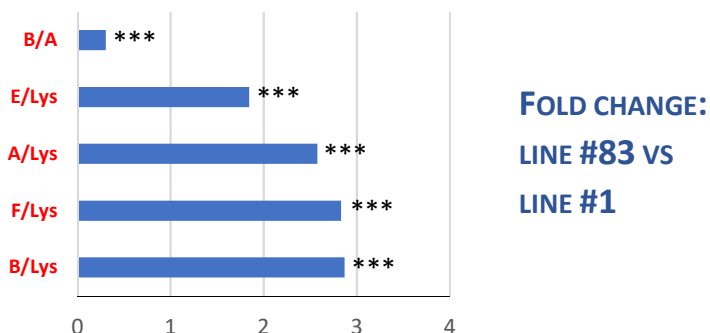

**D**

**CLONES FROM LINE #83** ■ **VS LINE #83** ■

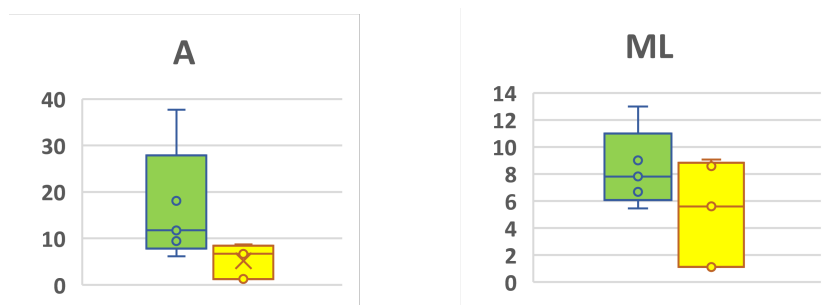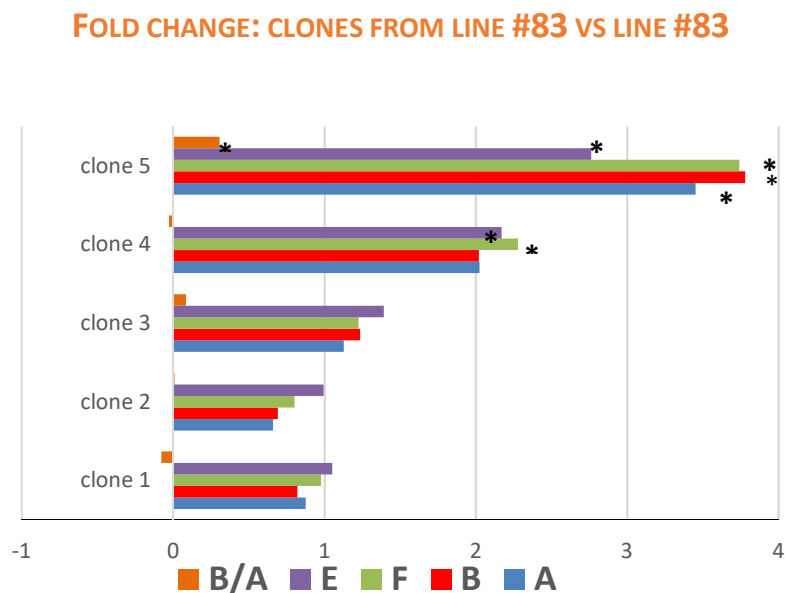

Supplement: s1 [file s1]
